# Supplementary material for: High ionic conductive, freezing-resistant and transparent polyurethane based on a novel metal ionic deep eutectic solvent
Source: Royal Society of Chemistry journal article supplement (doi:10.1039/d4tc00256c), 2024-01-01
Supplement: d4tc00256c1.pdf [file d4tc00256c1.pdf]

Supporting information

# High ionic conductive, freezing-resistant and transparent polyurethane based on a novel metal ionic deep eutectic solvent

*Menghao Du,<sup>1,2</sup> Xu Zhu,<sup>1,2</sup> Kaiyue Yang,<sup>1,2</sup> Haoge Cheng,<sup>1,2</sup> He Ma,<sup>1,2</sup> Kaihu Zhang,<sup>2</sup>,*

*Ning Ma,<sup>1,2</sup> Yuyun Yang,<sup>1,2,\*</sup> Xinyue Zhang<sup>1,2,\*</sup>*

<sup>1</sup>College of Materials Science and Chemical Engineering, Harbin Engineering University, Harbin, 150001, China.

<sup>2</sup>Qingdao Innovation and Development Center, Harbin Engineering University, Qingdao, 266000, China.

\*Email: yangyuyun@hrbeu.edu.cn; xinyue@hrbeu.edu.cn

## **Table of Contents**

1. Synthesis and Characterization of CPU (**Figure S1-S4**);
2. Mechanical Property of CPU (**Figure S5-S7**);
3. Electrical and Pressure Sensing Performance of CPU (**Figure S8-S10**);
4. Thermal Stability of CPU (**Figure S11-S13**);
5. Aging Resistance of CPU (**Figure S14**).

## 1. Synthesis and Characterization of CPU

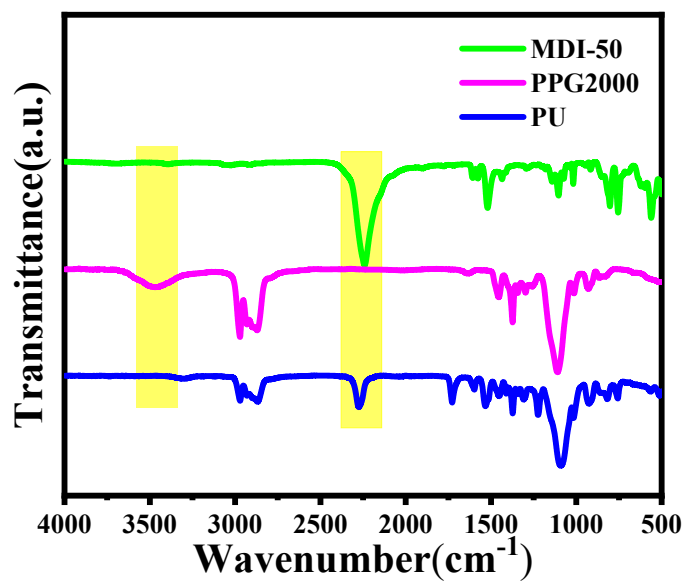

Figure S1. FTIR spectra of MDI-50, PPG2000 and polyurethane prepolymer.

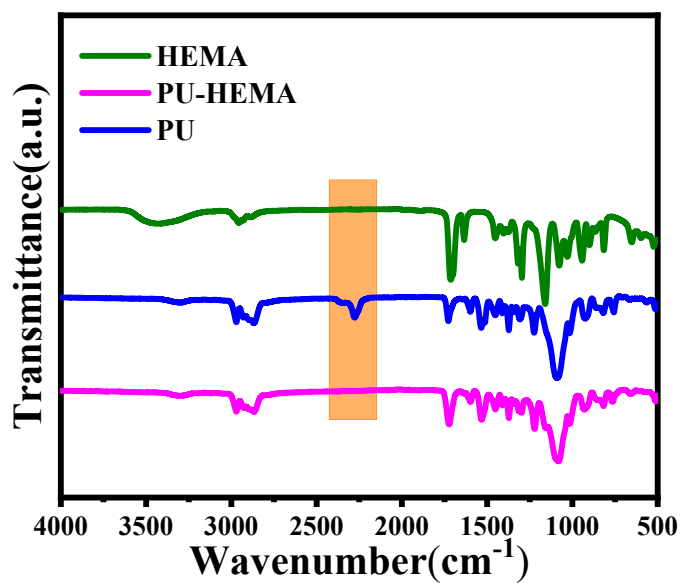

Figure S2. FTIR spectra of PU, HEMA and PU-HEMA.

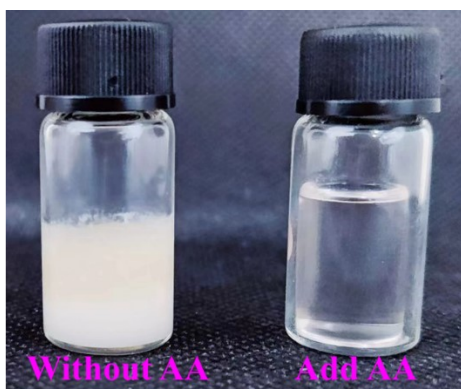

Figure S3. The photos of the CPU-5 without and with the addition of AA.

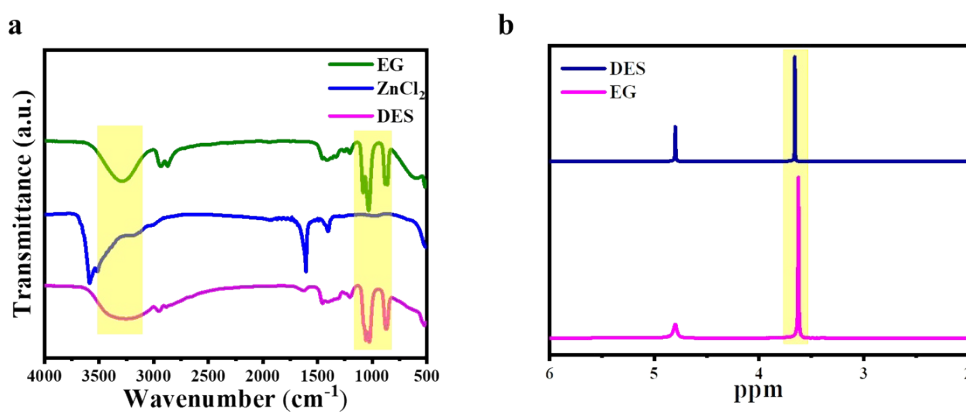

Figure S4. (a) The FTIR spectra of DES, ZnCl<sub>2</sub> and EG. (b) The <sup>1</sup>H NMR spectra of DES and EG.

## 2. Mechanical Property of CPU

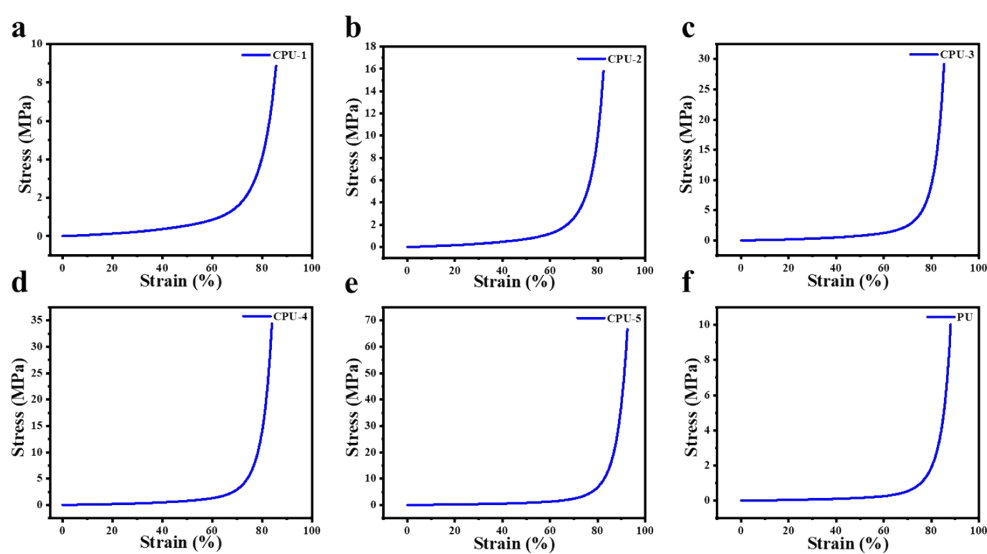

Figure S5. Stress-strain curves of CPUs 1-5 and PUs: (a) CPU-1, (b) CPU-2, (c) CPU-3. (d) CPU-4, (d) CPU-5, (f) PU.

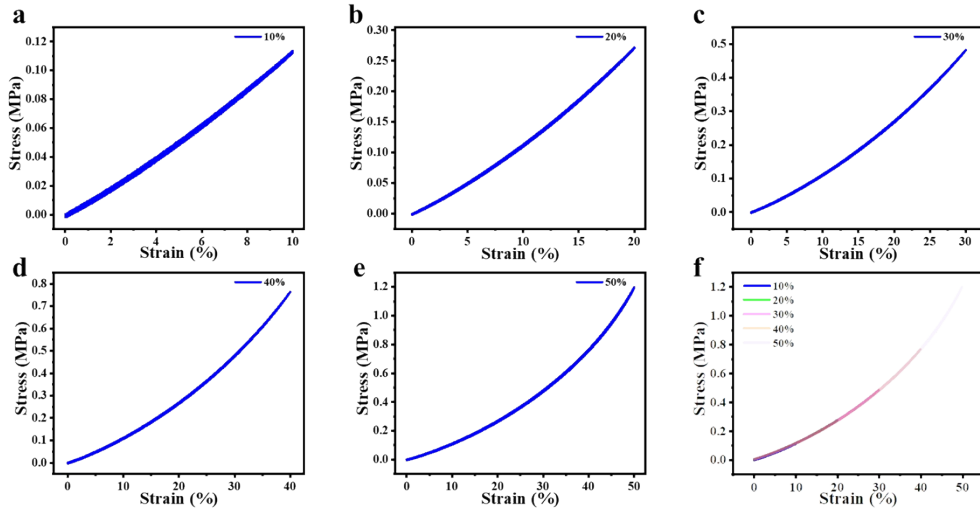

**Figure S6.** 10-50% cyclic compression stress-strain curves for CPU-5: (a) 10%, (b) 20%, (c) 30%, (d) 40%, (d) 50%, (f) comparison of cyclic compressive stress-strain curves at each loading strain.

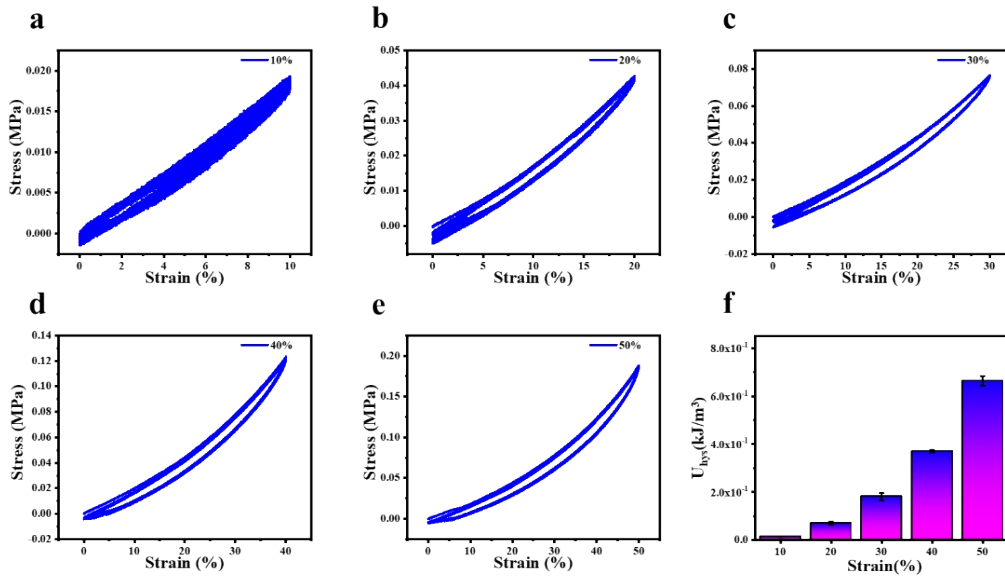

**Figure S7.** 10-50% cyclic compression stress-strain curves for PU: (a) 10%, (b) 20%, (c) 30%, (d) 40%, (d) 50%, (f) corresponding dissipated energy density at each loading strain.

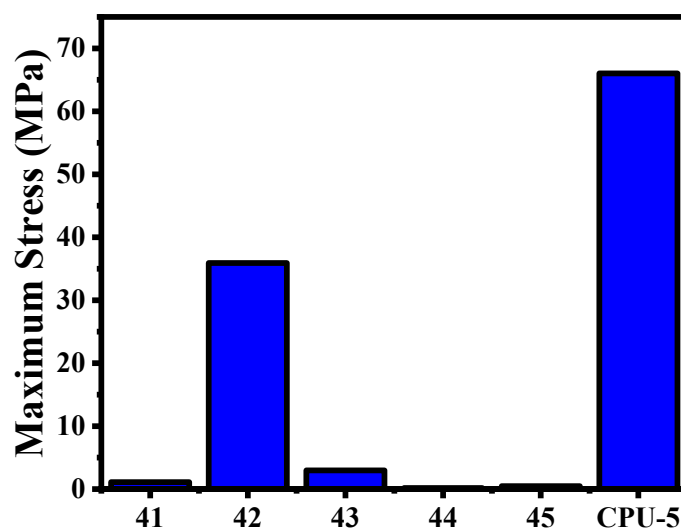

Figure S8. Comparison of mechanical properties of CPU-5 with other ionic conductors.

### 3. Electrical and Pressure Sensing Performance of CPU

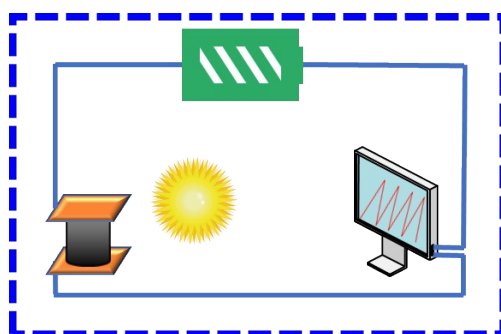

Figure S9. Scheme of the assembled pressure sensor.

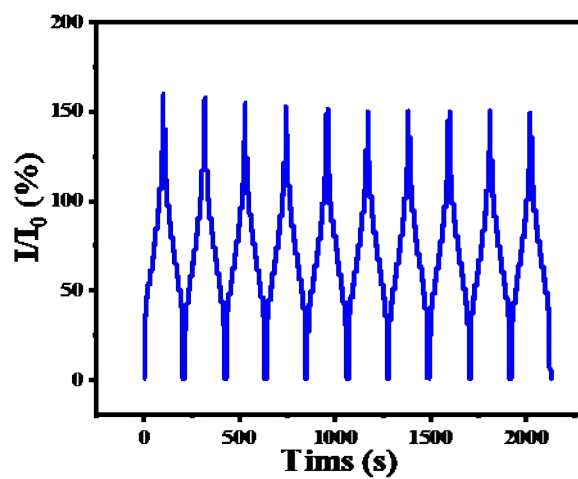

**Figure S10.** Electrical signal response plots for 10 30% load-unload cycles after 30 days of CPU-5 in air placement.

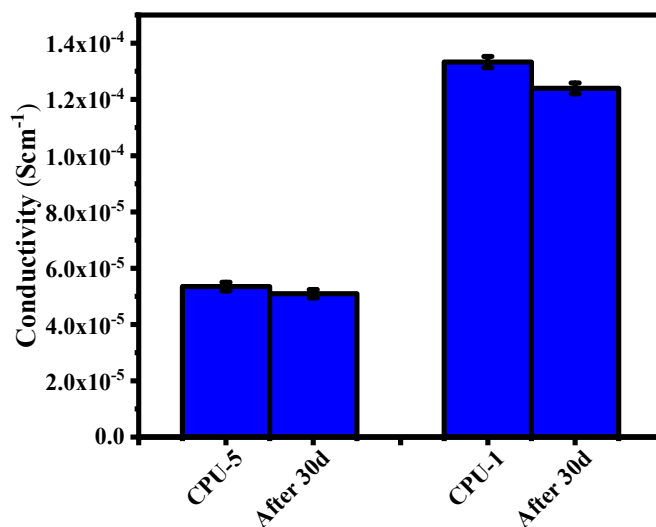

**Figure S11.** Plot of conductivity comparison between CPU-1 and CPU-5 before and after 30 days at room temperature.

#### 4. Thermal Stability of CPU

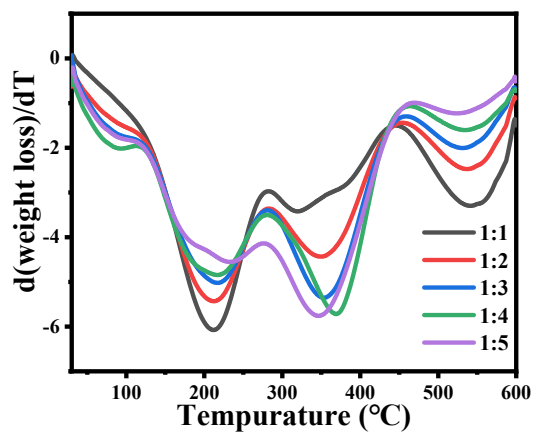

**Figure S12.** The DTG curves of different CPU samples.

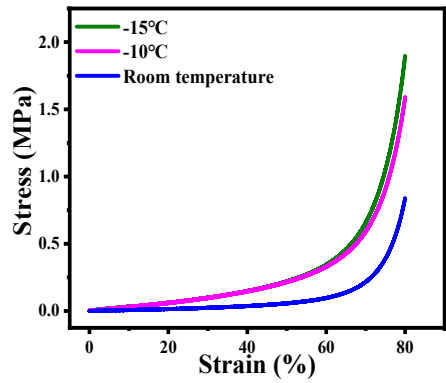

**Figure S13.** Stress-strain curves of PU subjected to 80% compression at -15°C, -10°C and room temperature.

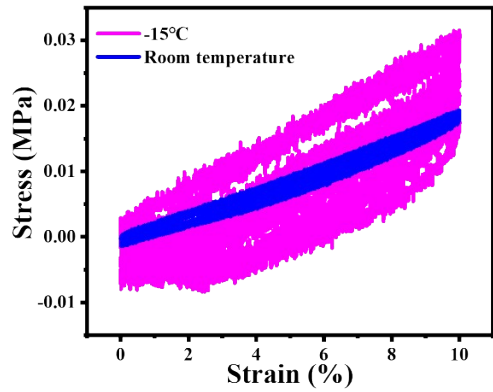

**Figure S14.** Stress-strain curves of PU subjected to 10 cycles of 10% compression at -15°C and room temperature.

## 5. Aging Resistance of CPU

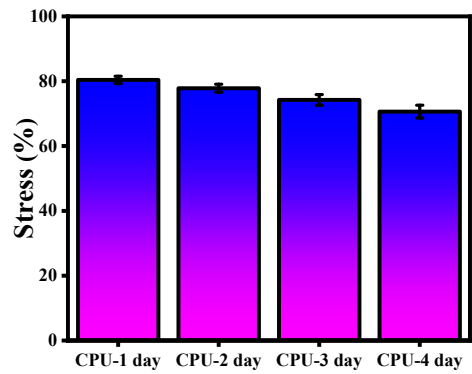

**Figure S15.** Percentage change in stress at compression to 80% for CPU-5 after UV aging for 1 to 4 days compared to unaged samples.
